# Supplementary material
Source: ML conference proceedings conference paper supplement (https://openreview.net/forum?id=FAXVNe1GxX)
Supplement: supplementary_material [file attachment]

# DOW JONES 30

A dataset contains day-level price and volume information of 29 stocks from DJ 30 index with a total of 87609 data samples.

| Dataset Snapshot                                                                                                                                                                |            |           |           |           |                                                                                                                                                                          |           |      |     |
|---------------------------------------------------------------------------------------------------------------------------------------------------------------------------------|------------|-----------|-----------|-----------|--------------------------------------------------------------------------------------------------------------------------------------------------------------------------|-----------|------|-----|
| <b>NATURE OF CONTENT</b><br>Date, trading price (open, high, low, close price), trading volume, stock ticker and day of the week (0, 1, 2, 3, 4 representing Monday to Friday). |            |           |           |           |                                                                                                                                                                          |           |      |     |
| <b>BREAKDOWN-BY INSTANCE</b>                                                                                                                                                    |            |           |           |           | <b>NOTES</b>                                                                                                                                                             |           |      |     |
| Total instances                                                                                                                                                                 | 87609      |           |           |           | Stock data is collected daily from 2009-01-01 to 2020-12-31 on all trading days. The recommend split is [0.8,0.1,0.1] for training, validation and testing respectively. |           |      |     |
| Training                                                                                                                                                                        | 70093      |           |           |           |                                                                                                                                                                          |           |      |     |
| Validation                                                                                                                                                                      | 8758       |           |           |           |                                                                                                                                                                          |           |      |     |
| Testing                                                                                                                                                                         | 8758       |           |           |           |                                                                                                                                                                          |           |      |     |
| Total stocks                                                                                                                                                                    | 29         |           |           |           |                                                                                                                                                                          |           |      |     |
| Instances per stock                                                                                                                                                             | 3021       |           |           |           |                                                                                                                                                                          |           |      |     |
| <b>EXAMPLES OF ACTUAL DATA POINT</b>                                                                                                                                            |            |           |           |           |                                                                                                                                                                          |           |      |     |
|                                                                                                                                                                                 | date       | open      | high      | low       | close                                                                                                                                                                    | volume    | tic  | day |
| 0                                                                                                                                                                               | 2009-01-02 | 3.067143  | 3.251429  | 3.041429  | 2.767330                                                                                                                                                                 | 746015200 | AAPL | 4   |
| 1                                                                                                                                                                               | 2009-01-02 | 58.590000 | 59.080002 | 57.750000 | 44.867588                                                                                                                                                                | 6547900   | AMGN | 4   |
| 2                                                                                                                                                                               | 2009-01-02 | 18.570000 | 19.520000 | 18.400000 | 15.477424                                                                                                                                                                | 10955700  | AXP  | 4   |
| 3                                                                                                                                                                               | 2009-01-02 | 42.799999 | 45.560001 | 42.779999 | 33.941097                                                                                                                                                                | 7010200   | BA   | 4   |
| 4                                                                                                                                                                               | 2009-01-02 | 44.910000 | 46.980000 | 44.709999 | 31.942234                                                                                                                                                                | 7117200   | CAT  | 4   |

| Publisher & Licenses & Access                          |                     |                                                                                                                                   |
|--------------------------------------------------------|---------------------|-----------------------------------------------------------------------------------------------------------------------------------|
| PUBLISHER<br>Yahoo Finance                             |                     | LICENSE PERMISSIONS<br>You are free to share and adapt.<br>Attribution required.<br>You cannot apply any additional restrictions. |
| DIRECT LINKS TO DATASET<br><a href="#">GitHub link</a> |                     |                                                                                                                                   |
| ACCESS<br>Open Access                                  | ACCESS COST<br>Free | LICENSE TYPE(S)<br>CC-BY-4.0                                                                                                      |

| Motivations & Use                                                                                                                                                                                                                       |                                                                                                                     |
|-----------------------------------------------------------------------------------------------------------------------------------------------------------------------------------------------------------------------------------------|---------------------------------------------------------------------------------------------------------------------|
| <b>DATASET PURPOSE</b><br>The dataset was created to provide data of US large companies’ stock trading for research in various quantitative trading tasks by selecting the most prominent stocks at New York Stock Exchange and NASDAQ. |                                                                                                                     |
| <b>INTENDED USE CASES</b> <ul style="list-style-type: none"><li>Algorithmic trading</li><li>Portfolio Management</li></ul>                                                                                                              | <b>EXTENDED USE</b> <ul style="list-style-type: none"><li>Intraday trading</li><li>High frequency trading</li></ul> |

| Collection                                                                                                                                        |  |  |
|---------------------------------------------------------------------------------------------------------------------------------------------------|--|--|
| <b>DATA SOURCE</b><br>Trading information of stocks at Nasdaq and New York Stock Exchange, retrieved from Yahoo! Finance API                      |  |  |
| <b>DATA COLLECTION</b><br>Retrieved from Yahoo! Finance API using the following code, where tic is the stock ticker from Dow Jones 30 stock list: |  |  |
| <pre>import yfinance as yf start_date='2009-01-01' end_date='2021-01-01' data_df = yf.download(tic , start = start_date , end = end_date)</pre>   |  |  |

# Preprocessing

## INDICATOR ADJUSTMENT

The raw data consists of 8 indicators, which are date, open, high, low, close, adjcp, volume and tic. Our dataset uses adjusted close price (adjcp) to replace original close price because it is considered as a more accurate measure of stock’s value.

## DATA CLEANING

Firstly, all the NaN terms are dropped, and it is observed that some of the stocks are lack of data (number of instances less than 3021). In order to maintain consistency, data of these stocks are filtered out.

## FEATURE GENERATION

We generate 11 temporal features to describe the financial markets.  $z_{open}$ ,  $z_{high}$ ,  $z_{low}$  represent the relative values of the open, high, low prices compared with the close price at current time step, respectively.  $z_{close}$  represents the relative values of the closing prices compared with time step t-1.  $z_{dk}$  represents a long-term moving average of the adjusted close prices during the last  $k$  time steps compared to the current close prices. The detailed calculation formulas are as follow:

| Features                                                              | Calculation Formula                                                     |
|-----------------------------------------------------------------------|-------------------------------------------------------------------------|
| $z_{open}, z_{high}, z_{low}$                                         | $z_{open} = open_t / close_t - 1$                                       |
| $z_{close}, z_{adj\_close}$                                           | $z_{close} = close_t / close_{t-1} - 1$                                 |
| $z_{d\_5}, z_{d\_10}, z_{d\_15}$<br>$z_{d\_20}, z_{d\_25}, z_{d\_30}$ | $z_{d\_5} = \frac{\sum_{i=0}^4 adj\_close_{t-i} / 5}{adj\_close_t} - 1$ |

| Maintenance & Status                 |                                 |                               |
|--------------------------------------|---------------------------------|-------------------------------|
| <b>STATUS</b><br>Actively Maintained | <b>FIRST RELEASE</b><br>08/2022 | <b>CURRENT VERSION</b><br>1.0 |
