# Supplementary material
Source: ML conference proceedings conference paper supplement (https://openreview.net/forum?id=FAXVNe1GxX)
Supplement: supplementary_material [file attachment]

# Cryptocurrency

A dataset contains day-level price and volume information of 8 cryptocurrencies with a total of 13384 data samples.

| Dataset Snapshot                                                                                                                                                                      |            |              |              |              |                                                                                                                                                                          |             |          |     |
|---------------------------------------------------------------------------------------------------------------------------------------------------------------------------------------|------------|--------------|--------------|--------------|--------------------------------------------------------------------------------------------------------------------------------------------------------------------------|-------------|----------|-----|
| <b>NATURE OF CONTENT</b><br>Date, trading price (open, high, low, close price), trading volume, stock ticker and day of the week (0, 1, 2, 3, 4, 5, 6 representing Monday to Sunday). |            |              |              |              |                                                                                                                                                                          |             |          |     |
| <b>BREAKDOWN-BY INSTANCE</b>                                                                                                                                                          |            |              |              |              | <b>NOTES</b>                                                                                                                                                             |             |          |     |
| Total instances                                                                                                                                                                       |            | 13384        |              |              | Stock data is collected daily from 2018-01-02 to 2022-08-01 on all trading days. The recommend split is [0.8,0.1,0.1] for training, validation and testing respectively. |             |          |     |
| Training                                                                                                                                                                              |            | 10712        |              |              |                                                                                                                                                                          |             |          |     |
| Validation                                                                                                                                                                            |            | 1336         |              |              |                                                                                                                                                                          |             |          |     |
| Testing                                                                                                                                                                               |            | 1336         |              |              |                                                                                                                                                                          |             |          |     |
| Total cryptocurrencies                                                                                                                                                                |            | 8            |              |              |                                                                                                                                                                          |             |          |     |
| Instances per stock                                                                                                                                                                   |            | 1673         |              |              |                                                                                                                                                                          |             |          |     |
| <b>EXAMPLES OF ACTUAL DATA POINT</b>                                                                                                                                                  |            |              |              |              |                                                                                                                                                                          |             |          |     |
|                                                                                                                                                                                       | date       | open         | high         | low          | close                                                                                                                                                                    | volume      | tic      | day |
| 0                                                                                                                                                                                     | 2018-01-02 | 13625.000000 | 15444.599609 | 13163.599609 | 14982.099609                                                                                                                                                             | 16846600192 | BTC-USD  | 1   |
| 1                                                                                                                                                                                     | 2018-01-02 | 0.008873     | 0.009598     | 0.008551     | 0.009145                                                                                                                                                                 | 89424096    | DOGE-USD | 1   |
| 2                                                                                                                                                                                     | 2018-01-02 | 772.346008   | 914.830017   | 772.346008   | 884.443970                                                                                                                                                               | 5783349760  | ETH-USD  | 1   |
| 3                                                                                                                                                                                     | 2018-01-02 | 228.990005   | 263.625000   | 228.990005   | 255.684006                                                                                                                                                               | 1237949952  | LTC-USD  | 1   |
| 4                                                                                                                                                                                     | 2018-01-02 | 1.041660     | 1.196800     | 1.034600     | 1.160180                                                                                                                                                                 | 108186000   | XEM-USD  | 1   |

| Publisher & Licenses & Access                   |                     |                                                                                                                                            |
|-------------------------------------------------|---------------------|--------------------------------------------------------------------------------------------------------------------------------------------|
| PUBLISHER<br>CoinMarketCap                      |                     | LICENSE PERMISSIONS<br>You can copy, modify, distribute and perform the work, even for commercial purposes, all without asking permission. |
| DIRECT LINKS TO DATASET<br><a href="#">link</a> |                     |                                                                                                                                            |
| ACCESS<br>Open Access                           | ACCESS COST<br>Free | LICENSE TYPE(S)<br>CC0 1.0                                                                                                                 |

| Motivations & Use                                                                                                                                                                                                 |                                                                                                                     |
|-------------------------------------------------------------------------------------------------------------------------------------------------------------------------------------------------------------------|---------------------------------------------------------------------------------------------------------------------|
| <b>DATASET PURPOSE</b><br>The dataset was created to provide representative data of cryptocurrency trading for research in various quantitative trading tasks by selecting the most influential cryptocurrencies. |                                                                                                                     |
| <b>INTENDED USE CASES</b> <ul style="list-style-type: none"><li>Algorithmic trading</li><li>Portfolio Management</li></ul>                                                                                        | <b>EXTENDED USE</b> <ul style="list-style-type: none"><li>Intraday trading</li><li>High frequency trading</li></ul> |

| Collection                                                                                                                                                                                                                                             |
|--------------------------------------------------------------------------------------------------------------------------------------------------------------------------------------------------------------------------------------------------------|
| <b>DATA SOURCE</b><br>Retrieved from Kaggle                                                                                                                                                                                                            |
| <b>DATA COLLECTION</b><br>We download the data from Kaggle following this link:<br><a href="https://www.kaggle.com/datasets/sudalairajkumar/cryptocurrencypricehistory">https://www.kaggle.com/datasets/sudalairajkumar/cryptocurrencypricehistory</a> |

| Preprocessing                                                                                                                                                                                                                                                                                                                                                                                                                                                                                                                                                                                                                                                                                                                                                                                                                                                                                                                                                                                                                                                                                                                                             |                                                                         |                     |                               |                                   |                             |                                         |                                                                       |                                                                         |
|-----------------------------------------------------------------------------------------------------------------------------------------------------------------------------------------------------------------------------------------------------------------------------------------------------------------------------------------------------------------------------------------------------------------------------------------------------------------------------------------------------------------------------------------------------------------------------------------------------------------------------------------------------------------------------------------------------------------------------------------------------------------------------------------------------------------------------------------------------------------------------------------------------------------------------------------------------------------------------------------------------------------------------------------------------------------------------------------------------------------------------------------------------------|-------------------------------------------------------------------------|---------------------|-------------------------------|-----------------------------------|-----------------------------|-----------------------------------------|-----------------------------------------------------------------------|-------------------------------------------------------------------------|
| <h3>INDICATOR ADJUSTMENT</h3> <p>The raw data consists of 8 indicators, which are date, open, high, low, close, adjcp, volume and tic. Our dataset uses adjusted close price (adjcp) to replace original close price because it is considered as a more accurate measure of cryptocurrency’s value.</p>                                                                                                                                                                                                                                                                                                                                                                                                                                                                                                                                                                                                                                                                                                                                                                                                                                                   |                                                                         |                     |                               |                                   |                             |                                         |                                                                       |                                                                         |
| <h3>DATA CLEANING</h3> <p>Firstly, all the NaN terms are dropped, and it is observed that some of the cryptocurrencies are lack of data (number of instances less than 1673). In order to maintain consistency, data of these cryptocurrencies are filtered out.</p>                                                                                                                                                                                                                                                                                                                                                                                                                                                                                                                                                                                                                                                                                                                                                                                                                                                                                      |                                                                         |                     |                               |                                   |                             |                                         |                                                                       |                                                                         |
| <h3>FEATURE GENERATION</h3> <p>We generate 11 temporal features to describe the financial markets. <math>z_{open}</math>, <math>z_{high}</math>, <math>z_{low}</math> represent the relative values of the open, high, low prices compared with the close price at current time step, respectively. <math>z_{close}</math> represents the relative values of the closing prices compared with time step t-1. <math>z_{dk}</math> represents a long-term moving average of the adjusted close prices during the last <math>k</math> time steps compared to the current close prices. The detailed calculation formulas are as follow:</p> <table><tr><th>Features</th><th>Calculation Formula</th></tr><tr><td><math>z_{open}, z_{high}, z_{low}</math></td><td><math>z_{open} = open_t / close_t - 1</math></td></tr><tr><td><math>z_{close}, z_{adj\_close}</math></td><td><math>z_{close} = close_t / close_{t-1} - 1</math></td></tr><tr><td><math>z_{d\_5}, z_{d\_10}, z_{d\_15}</math><br/><math>z_{d\_20}, z_{d\_25}, z_{d\_30}</math></td><td><math>z_{d\_5} = \frac{\sum_{i=0}^4 adj\_close_{t-i} / 5}{adj\_close_t} - 1</math></td></tr></table> | Features                                                                | Calculation Formula | $z_{open}, z_{high}, z_{low}$ | $z_{open} = open_t / close_t - 1$ | $z_{close}, z_{adj\_close}$ | $z_{close} = close_t / close_{t-1} - 1$ | $z_{d\_5}, z_{d\_10}, z_{d\_15}$<br>$z_{d\_20}, z_{d\_25}, z_{d\_30}$ | $z_{d\_5} = \frac{\sum_{i=0}^4 adj\_close_{t-i} / 5}{adj\_close_t} - 1$ |
| Features                                                                                                                                                                                                                                                                                                                                                                                                                                                                                                                                                                                                                                                                                                                                                                                                                                                                                                                                                                                                                                                                                                                                                  | Calculation Formula                                                     |                     |                               |                                   |                             |                                         |                                                                       |                                                                         |
| $z_{open}, z_{high}, z_{low}$                                                                                                                                                                                                                                                                                                                                                                                                                                                                                                                                                                                                                                                                                                                                                                                                                                                                                                                                                                                                                                                                                                                             | $z_{open} = open_t / close_t - 1$                                       |                     |                               |                                   |                             |                                         |                                                                       |                                                                         |
| $z_{close}, z_{adj\_close}$                                                                                                                                                                                                                                                                                                                                                                                                                                                                                                                                                                                                                                                                                                                                                                                                                                                                                                                                                                                                                                                                                                                               | $z_{close} = close_t / close_{t-1} - 1$                                 |                     |                               |                                   |                             |                                         |                                                                       |                                                                         |
| $z_{d\_5}, z_{d\_10}, z_{d\_15}$<br>$z_{d\_20}, z_{d\_25}, z_{d\_30}$                                                                                                                                                                                                                                                                                                                                                                                                                                                                                                                                                                                                                                                                                                                                                                                                                                                                                                                                                                                                                                                                                     | $z_{d\_5} = \frac{\sum_{i=0}^4 adj\_close_{t-i} / 5}{adj\_close_t} - 1$ |                     |                               |                                   |                             |                                         |                                                                       |                                                                         |

| Maintenance & Status                 |                                 |                               |
|--------------------------------------|---------------------------------|-------------------------------|
| <b>STATUS</b><br>Actively Maintained | <b>FIRST RELEASE</b><br>08/2022 | <b>CURRENT VERSION</b><br>1.0 |
