# Supplementary material
Source: ML conference proceedings conference paper supplement (https://openreview.net/forum?id=FAXVNe1GxX)
Supplement: supplementary_material [file attachment]

# FX

A dataset contains day-level price of 21 currencies in exchange of US dollar with a total of 65478 data samples.

| Dataset Snapshot                                                                                                                                                   |            |          |          |                                                                                                                                                                          |          |          |     |
|--------------------------------------------------------------------------------------------------------------------------------------------------------------------|------------|----------|----------|--------------------------------------------------------------------------------------------------------------------------------------------------------------------------|----------|----------|-----|
| <b>NATURE OF CONTENT</b><br>Date, trading price (open, high, low, close price), currency ticker and day of the week (0, 1, 2, 3, 4 representing Monday to Friday). |            |          |          |                                                                                                                                                                          |          |          |     |
| <b>BREAKDOWN-BY INSTANCE</b>                                                                                                                                       |            |          |          | <b>NOTES</b>                                                                                                                                                             |          |          |     |
| Total instances                                                                                                                                                    | 65478      |          |          | Stock data is collected daily from 2009-01-02 to 2020-01-01 on all trading days. The recommend split is [0.8,0.1,0.1] for training, validation and testing respectively. |          |          |     |
| Training                                                                                                                                                           | 52416      |          |          |                                                                                                                                                                          |          |          |     |
| Validation                                                                                                                                                         | 6531       |          |          |                                                                                                                                                                          |          |          |     |
| Testing                                                                                                                                                            | 6531       |          |          |                                                                                                                                                                          |          |          |     |
| Total cryptocurrencies                                                                                                                                             | 21         |          |          |                                                                                                                                                                          |          |          |     |
| Instances per stock                                                                                                                                                | 3118       |          |          |                                                                                                                                                                          |          |          |     |
| <b>EXAMPLES OF ACTUAL DATA POINT</b>                                                                                                                               |            |          |          |                                                                                                                                                                          |          |          |     |
|                                                                                                                                                                    | date       | open     | high     | low                                                                                                                                                                      | close    | tic      | day |
| 0                                                                                                                                                                  | 2009-01-02 | 0.705020 | 0.711997 | 0.692521                                                                                                                                                                 | 0.709320 | AUDUSD=X | 4   |
| 1                                                                                                                                                                  | 2009-01-02 | 0.430293 | 0.433050 | 0.427936                                                                                                                                                                 | 0.432339 | BRLUSD=X | 4   |
| 2                                                                                                                                                                  | 2009-01-02 | 0.818063 | 0.829050 | 0.814730                                                                                                                                                                 | 0.826856 | CADUSD=X | 4   |
| 3                                                                                                                                                                  | 2009-01-02 | 0.146994 | 0.146994 | 0.146994                                                                                                                                                                 | 0.146994 | CNYUSD=X | 4   |
| 4                                                                                                                                                                  | 2009-01-02 | 0.188094 | 0.188459 | 0.185815                                                                                                                                                                 | 0.187105 | DKKUSD=X | 4   |

| Publisher & Licenses & Access                   |                     |                                                                                                                                            |
|-------------------------------------------------|---------------------|--------------------------------------------------------------------------------------------------------------------------------------------|
| PUBLISHER<br>Federal Reserve's Data Program     |                     | LICENSE PERMISSIONS<br>You can copy, modify, distribute and perform the work, even for commercial purposes, all without asking permission. |
| DIRECT LINKS TO DATASET<br><a href="#">link</a> |                     |                                                                                                                                            |
| ACCESS<br>Open Access                           | ACCESS COST<br>Free | LICENSE TYPE(S)<br>CC0 1.0                                                                                                                 |

| Motivations & Use                                                                                                                                                                                          |                                                                                                                     |
|------------------------------------------------------------------------------------------------------------------------------------------------------------------------------------------------------------|---------------------------------------------------------------------------------------------------------------------|
| <b>DATASET PURPOSE</b><br>The dataset was created to provide representative data of currency trading for research in various quantitative trading tasks by selecting the mainstream countries' currencies. |                                                                                                                     |
| <b>INTENDED USE CASES</b> <ul style="list-style-type: none"><li>Algorithmic trading</li><li>Portfolio Management</li></ul>                                                                                 | <b>EXTENDED USE</b> <ul style="list-style-type: none"><li>Intraday trading</li><li>High frequency trading</li></ul> |

| Collection                                                                                                                                                                                                                               |
|------------------------------------------------------------------------------------------------------------------------------------------------------------------------------------------------------------------------------------------|
| <b>DATA SOURCE</b><br>Retrieved from Kaggle                                                                                                                                                                                              |
| <b>DATA COLLECTION</b><br>We download the data from Kaggle following this link:<br><a href="https://www.kaggle.com/datasets/dhruvildave/currency-exchange-rates">https://www.kaggle.com/datasets/dhruvildave/currency-exchange-rates</a> |

# Preprocessing

## INDICATOR ADJUSTMENT

The raw data consists of 8 indicators, which are date, open, high, low, close, adjcp, volume and tic. Our dataset uses adjusted close price (adjcp) to replace original close price because it is considered as a more accurate measure of cryptocurrency’s value. Since the volume is not accessible, this indicator is also removed.

## DATA CLEANING

Firstly, all the NaN terms are dropped, and it is observed that some of the cryptocurrencies are lack of data. Also, it can be observed that only very few days of data is missing. In order to maintain consistency, data of these dates are filtered out.

## FEATURE GENERATION

We generate 11 temporal features to describe the financial markets.  $z_{open}$ ,  $z_{high}$ ,  $z_{low}$  represent the relative values of the open, high, low prices compared with the close price at current time step, respectively.  $z_{close}$  represents the relative values of the closing prices compared with time step t-1.  $z_{dk}$  represents a long-term moving average of the adjusted close prices during the last  $k$  time steps compared to the current close prices. The detailed calculation formulas are as follow:

| Features                                                              | Calculation Formula                                                     |
|-----------------------------------------------------------------------|-------------------------------------------------------------------------|
| $z_{open}, z_{high}, z_{low}$                                         | $z_{open} = open_t / close_t - 1$                                       |
| $z_{close}, z_{adj\_close}$                                           | $z_{close} = close_t / close_{t-1} - 1$                                 |
| $z_{d\_5}, z_{d\_10}, z_{d\_15}$<br>$z_{d\_20}, z_{d\_25}, z_{d\_30}$ | $z_{d\_5} = \frac{\sum_{i=0}^4 adj\_close_{t-i} / 5}{adj\_close_t} - 1$ |

| Maintenance & Status                 |                                 |                               |
|--------------------------------------|---------------------------------|-------------------------------|
| <b>STATUS</b><br>Actively Maintained | <b>FIRST RELEASE</b><br>08/2022 | <b>CURRENT VERSION</b><br>1.0 |
